# Supplementary material for: Complex non-falciparum transmission and widespread insecticide resistance in Penka-Michel, a hyperendemic malaria focus of the Cameroon highlands
Source: Research Square preprint supplement (doi:10.21203/rs.3.rs-9488336/v1), 2026-05-25

**Complex non-*falciparum* transmission and widespread insecticide resistance in Penka-Michel, a hyperendemic malaria focus of the Cameroon highlands.**

Belinda Claire Kiam1,2, Ibrahima Ibrahima1,2, Aline Gaëlle Bouopda-Tuedom2, Jean Arthur Mbida Mbida1, Luc Abate3, Samuel J. White4, Charlène Tina Nanssong V.1,2, Brigitte Fotso Tumamo2, Isabelle Morlais3, Lawrence Ayong2, Jessica T. Lin4‡, Innocent MbulliAli5‡, Jonathan J. Juliano4‡, Rhoel R. Dinglasan6‡*, Sandrine Eveline Nsango2,7*‡

Supplemental Table S1……………………………………………………………………….. 2

Supplemental Table S2……………………………………………………………………….. 4

Supplemental Table S3……………………………………………………………………….. 5

Supplemental Table S4……………………………………………………………………….. 6

Supplemental Table S5……………………………………………………………………….. 7

Supplemental Table S6……………………………………………………………………….. 8

Supplemental Table S7……………………………………………………………………….. 9

Supplemental Table S8……………………………………………………………………….. 10

Supplemental Figure S1……………………………………………………………………… 11

Supplemental Figure S2……………………………………………………………………… 11

Supplemental Figure S3……………………………………………………………………… 12

Supplemental Figure S4……………………………………………………………………… 13

Supplemental Figure S5……………………………………………………………………… 14

Supplemental Figure S6……………………………………………………………………… 15

**Supplemental tables**

**Table S1**: Malaria qPCR methods.

| *Plasmodium* species (18S) | | | | |
| --- | --- | --- | --- | --- |
| Adapted from | Mangold *et al*., 2005 | | | |
| PL1473 Forward 18S | 5’-TAA CGA ACG AGA TCT TAA-3’ | | | |
| PL1679 Reverse 18S | 5’-GTT CCT CTA AGA AGC TTT-3’ | | | |
| Cycling conditions | 1 cycle | 1 cycle | 45 cycles | |
| Temperature (°C) | 95 | 72 | 95 | 50 |
| Time | 10 min | 20 s | 10 s | 5 s |
| Reaction conditions | HOT FIREPol® Evagreen® qPCR Mix Plus (ROX), 5x | | | |
|  | PL1473F18 | 300 nM | | |
|  | PL1679R18 | 300 nM | | |
|  | Template DNA | 1 µL | | |
|  | Total volume | 10 µL | | |
| *Plasmodium ovale* (18S) | | | | |
| Adapted from | Mitchell *et al*., 2011 | | | |
| Forward primer | 5’-CCRACTAGGTTTTGGATGAAAVRTTTTT-3’ | | | |
| Reverse primer | 5'-AACCCAAAGACTTTGATTTCTCATAA-3’ | | | |
| Probe (VIC) | 5’-VIC/CRA AAGGAATTYTCTTATT /MGB-3’ | | | |
| Cycling conditions | 1 cycle | 1 cycle | 45 cycles | |
| Temperature (°C) | 95 | 50 | 95 | 52 |
| Time | 10 min | 2 min | 15 s | 1 min |
| Reaction conditions | 2X TaqMan Master mix | | | |
|  | Fwd primer | 400 nM | | |
|  | Rev primer | 400 nM | | |
|  | Probe | 200 nM | | |
|  | gDNA | 2 µL | | |
|  | Total volume | 10 µL | | |
| *Plasmodium vivax* (18S) | | | | |
| Adapted from | Brazeau *et al*., 2021 | | | |
| Forward primer | 5’-ACGCTTCTAGCTTAATCCACATAACT-3’ | | | |
| Reverse primer | 5’-ATTTACTCAAAGTAACAAGGACTTCCAAGC-3’ | | | |
| Probe (FAM) | 5'-/56-FAM/TTCGTATCG/ZEN/ACTTTGTGCGCATTTTGC/3IABkFQ/-3’ | | | |
| Cycling conditions | 1 cycle | 1 cycle | 45 cycles | |
| Temperature (°C) | 95 | 50 | 95 | 60 |
| Time | 10 min | 2 min | 15 s | 1 min |
| Reaction conditions | 2X TaqMan Master mix | | | |
|  | Fwd primer | 400 nM | | |
|  | Rev primer | 400 nM | | |
|  | Probe | 200 nM | | |
|  | gDNA | 2 µL | | |
|  | Total volume | 10 µL | | |
| *Plasmodium ovale* subspecies (18S) | | | | |
| Adapted from | Potlapalli *et al*., 2023 | | | |
| Forward primer (Poc) | 5’TTTTGAAGAATACATTAGGATACAATTAATG-3’ | | | |
| Reverse primer (Poc) | 5’-CATCGTTCCTCTAAGAAGCTTTACAAT-3’ | | | |
| Probe Poc (VIC) | 5’-CCTTTTCCCTATTCTACTTAATTCGCAATTCATG-3’ | | | |
| Forward primer (Pow) | 5’-TTTTGAAGAATATATTAGGATACATTATAG-3’ | | | |
| Reverse primer (Pow) | 5’-CATCGTTCCTCTAAGAAGCTTTACAAT-3’ | | | |
| Probe Pow (FAM) | 5’-CCTTTTCCCTTTTCTACTTAATTCGCTATTATG -3’ | | | |
| Cycling conditions | 1 cycle | 1 cycle | 50 cycles | |
| Temperature (°C) | 95 | 60 | 95 | 52.8 |
| Time | 10 min | 1 min | 15 s | 30 s |
| Reaction conditions | 2X TaqMan Master mix | | | |
|  | Fwd primer | 300 nM | | |
|  | Rev primer | 300 nM | | |
|  | Probe | 200 nM | | |
|  | gDNA | 2 µL | | |
|  | Total volume | 10 µL | | |

**Table S2**: Resistance PCR primers, probes, and reaction conditions.

| Genes | Primers and probes (concentrations) | 5′ modifications | Sequences | Reaction condition |
| --- | --- | --- | --- | --- |
| L1014F-kdr | Agd1 | **-** | ATAGATTCCCCGACCATG | 1 cycle: 94 °C for 3 min 35 cycles: 94 °C for 30 s, 55 °C for 30 s, 72 °C for 10 s 1 cycle: 72 °C for 5 min |
| Agd2 | AGACAAGGATGATGAACC |
| Agd3 | AATTTGCATTACTTACGACA |
| Agd4 | CTGTAGTGATAGGAAATTTA |
| N1575Y | Forward (1 µM) | - | TGGATCGCTAGAAATGTTCATGACA | 1 cycle: 15 min at 95 °C 40 cycles: 15 s at 94 °C, 1 min at 60 °C |
| Reverse (1 µM) | - | CGAGGAATTGCCTTTAGAGGTTTCT |
| Probe WT (0.5 µM) | HEX | ATTTTTTTCATTGCATTATAGTAC |
| Probe MUT (0.5 µM) | FAM | TTTTTCATTGCATAATAGTAC |
| G119S-Ace 1 | Forward |  | GGCCGTCATGCTGTGGAT | 95°C | 95°C 60°C |  10’ | 10” 35” |  X40 cycles |
| Reverse |  | GCGGTGCCGGAGTAGA |
| Probe WT | HEX | TTCGGCGGC/ZEN/GGCT/3IABKFQ |
| Probe MUT | FAM | TTCGGCGGC/ZEN/AGCT/3IABKFQ |
| CYP6P3 | Forward |  | AATACACTTAAGACGACCGACTC | 95°C | 95°C 60°C |  10’ | 10” 45” |  X40 cycles |
| Reverse |  | GCGAGGAAGGTCTTCATCAT |
| Probe MUT | FAM | AC+TTGCG+GA+A+G+TC/3IABKFQ |
| Probe -WT | HEX | ACTTG+CG+GA+A+C+TC/3IABKFQ |
| L119F-GSTe2 | Forward (1 µM) | - | AACAATTTTTCATTTCTTATTCTCATTTAC | 1 cycle: 10 min at 95 °C 40 cycles: 15 s at 92 °C and 1 min at 60 °C |
| Reverse (1 µM) | - | CGACTCGATCTTCGGGAATGTC |
| Probe MUT (0.5 µM) | FAM | AGGAGCGTATTCTTTTCTAC |
| Probe WT (0.5 µM) | HEX | AGGAGCGTATTTTTTTCTA |
| CYP6P9a | Forward (1 µM) | - | TCCCGAAATACAGCCTTTCAG | 1 cycle: 95 °C for 3 min 40 cycles: 94 °C for 30 s, 55 °C for 30 s, 72 °C for 1 min 1 cycle: 72 °C for 10 min |
| Reverse (1 µM) | - | ATTGGTGCCATCGCTAGAAG |
| CYP6P9b | Forward (1 µM) | - | CCCCCACAGGTGGTAACTATCTGAA | 1 cycle: 95 °C for 3 min 40 cycles: 94 °C for 30 s, 58 °C for 30 s, 72 °C for 1 min 1 cycle: 72 °C for 10 min |
| Reverse (1 µM) | - | TTATCCGTAACTCAATAGCGATG |

**Table S3**: Monthly collected mosquito composition.

| Months | *Anopheles* | *Aedes* | *Culex* | *Mansonia* | *Coquillettidia* | Total | Percentage |
| --- | --- | --- | --- | --- | --- | --- | --- |
| Sept-23 | 1008 | 11 | 3 | - | 1 | 1023 | 16.06 |
| Oct-23 | 972 | 37 | 16 | - | 1 | 1026 | 16.10 |
| Nov-23 | 781 | 2 | 8 | 2 | - | 793 | 12.45 |
| Dec-23 | 153 | 1 | 1 | - | - | 155 | 2.43 |
| Jan-24 | 45 | - | - | - | - | 45 | 0.71 |
| Feb-24 | 46 | 1 | 2 | 2 | - | 51 | 0.80 |
| Mar-24 | 166 | 11 | 4 | - | - | 181 | 2.84 |
| Apr-24 | 524 | 10 | 16 | - | - | 550 | 8.63 |
| May-24 | 841 | 34 | 17 | 1 | - | 893 | 14.02 |
| Jun-24 | 785 | 6 | 15 | - | - | 806 | 12.65 |
| Jul-24 | 458 | 1 | 9 | - | - | 468 | 7.35 |
| Aug-24 | 373 | 2 | 5 | - | - | 380 | 5.96 |
| Total | 6152 | 116 | 96 | 5 | 2 | 6371 | 100.00 |

**Table S4**: Monthly variation in the abundance of *Anopheles* species collected.

| Months | *An. gambiae* s.l. | | *An. funestus* s.l. | | *An. ziemanni* | | Total  (n) | Density  (D) | Percentage  (%) |
| --- | --- | --- | --- | --- | --- | --- | --- | --- | --- |
|  | Ind | Out | Ind | Out | Ind | Out |  |  |  |
| Sept-23 | 318 | 368 | 127 | 149 | 14 | 32 | 1008 | 100.8 | 16.4 |
| Oct-23 | 170 | 233 | 117 | 139 | 140 | 173 | 972 | 162 | 15.8 |
| Nov-23 | 184 | 144 | 77 | 68 | 115 | 193 | 781 | 130.17 | 12.7 |
| Dec-23 | 17 | 6 | 9 | 10 | 42 | 69 | 153 | 25.5 | 2.5 |
| Jan-24 | 6 | 10 | 12 | 9 | - | 8 | 45 | 7.5 | 0.7 |
| Feb-24 | 6 | 13 | 12 | 15 | - | - | 46 | 7.67 | 0.7 |
| Mar-24 | 45 | 33 | 34 | 54 | - | - | 166 | 27.67 | 2.7 |
| Apr-24 | 140 | 166 | 93 | 124 | - | 1 | 524 | 87.33 | 8.5 |
| May-24 | 146 | 140 | 245 | 309 | - | 1 | 841 | 140.17 | 13.7 |
| Jun-24 | 124 | 63 | 317 | 273 | 4 | 4 | 785 | 130.84 | 12.8 |
| Jul-24 | 114 | 80 | 132 | 118 | 8 | 6 | 458 | 76.33 | 7.4 |
| Aug-24 | 59 | 51 | 132 | 112 | 10 | 9 | 373 | 62.17 | 6.1 |
| Total | 2636 | | 2687 |  | 829 |  | 6152 | 958.15 | 100.00 |

Ind: Indoor; Out: Outdoor; F=4.61, df=11, p<0.001

**Table S5**: Entomological indices of collected *Anopheles* between seasons during the study period.

| Species | Biting place | N° captured | N° tested | IR % (N° Infected) | HBR (b/h/n) | EIR (ib/h/n) |
| --- | --- | --- | --- | --- | --- | --- |
| (a) Rainy season | | | | | | |
| *An. funestus* s.l. | Indoor | 1240 | 400 | 8.5 (34) | 15.5 | 1.3 |
| Outdoor | 1292 | 400 | 9.3 (37) | 16.2 | 1.5 |
| Total | 2532 | 800 | 8.9 (71) | 15.8 | 1.4 |
| *An. gambiae* s.l. | Indoor | 1255 | 400 | 4.5 (18) | 15.7 | 0.7 |
| Outdoor | 1245 | 400 | 7.0 (28) | 15.6 | 1.0 |
| Total | 2500 | 800 | 5.8 (46) | 15.6 | 0.9 |
| *An. ziemanni* | Indoor | 291 | 138 | 0.7 (1) | 3.6 | 0.03 |
| Outdoor | 419 | 153 | 2.0 (3) | 5.2 | 0.1 |
| Total | 710 | 291 | 1.4 (4) | 4.4 | 0.06 |
| Species |  | N° captured | N° tested | IR (N° Infected) | HBR (ib/h/n) | EIR (ib/h/n) |
| (b) Dry season | | | | | | |
| *An. funestus* s.l. | Indoor | 67 | 67 | 1.5 (1) | 1.7 | 0.03 |
| Outdoor | 88 | 88 | 2.3 (2) | 2.2 | 0.05 |
| Total | 155 | 155 | 1.9 (3) | 1.9 | 0.04 |
| *An. gambiae* s.l*.* | Indoor | 74 | 74 | 4.1 (3) | 1.8 | 0.08 |
| Outdoor | 62 | 62 | 3.2 (2) | 1.6 | 0.05 |
| Total | 136 | 136 | 3.7 (5) | 1.7 | 0.06 |
| *An. ziemanni* | Indoor | 42 | 42 | 2.4 (1) | 1.1 | 0.03 |
| Outdoor | 77 | 66 | 1.5 (1) | 1.9 | 0.03 |
| Total | 119 | 108 | 1.9 (2) | 1.5 | 0.03 |

IR=Infection Rate, HBR= Human Biting Rate, EIR= Entomological Inoculation Rate, b/h/n= bites/human/night, ib/h/n= infected bites/human/night, N°=Number

**Table S6**: Seasonal variation in observed and expected heterozygosity, fixation index, and Hardy-Weinberg equilibrium.

| Species | Mutation | Ho (%) | He (%) | Fis  (W & C) | HWE  *p*-value | Interpretation of Panmixia |
| --- | --- | --- | --- | --- | --- | --- |
| *An. gambiae* s.l. | L1014F | 16.75 | 18.32 | +0.085 | 0.03 | Rejected: Slight deficit of heterozygotes (F>0). Indicates inbreeding or population structure. |
| N1575Y | 11.63 | 11.46 | -0.015 | 0.9 | Not Rejected: Close to panmictic equilibrium. |
| G119S-Ace1 | 48.99 | 49.98 | +0.020 | <2.2e-16 | Rejected: Very slight deviation (F close toˆ0), but the HWE test is statistically significant. |
| CYP6P3 | 27.85 | 32.08 | +0.132 | <0.001 | Rejected: Moderate deficit of heterozygotes (F>0). Indicates inbreeding/structure. |
| *An. funestus* s.l. | L119F-GSTe2 | 25.58 | 49.37 | +0.482 | <2.2e-16 | Strongly Rejected: Very strong deficit (F close to 0.5). Indicates severe Wahlund effect or high inbreeding. |
| CYP6P9a | - | - | - | - | Equilibrium: Allele fixed for susceptibility. |
| CYP6P9b | - | - | - | - | Equilibrium: Allele fixed for susceptibility. |
| *An. ziemanni* | L1014F | 8.52 | 20.83 | +0.591 | <2.2e-16 | Strongly Rejected: Very strong deficit (F close to 0.6). Severe Wahlund effect or high inbreeding. |

FIS: fixation index; Ho: observed heterozygosity; He: expected heterozygosity; HWE: Hardy-Weinberg equilibrium

**Table S7**: Poisson binomial GLM showing associations between climatic factors and *Anopheles* species abundance.

| Term | IRR | P_value | Species | LCI_95 | UCI_95 |
| --- | --- | --- | --- | --- | --- |
| (Intercept) | 66.3063290 | 0.0000000 | *An.funestus* s.l. | 54.3121846 | 80.9492253 |
| scale(as.numeric(Temp)) | 1.0261596 | 0.8780003 | *An.funestus* s.l. | 0.7379414 | 1.4269473 |
| scale(as.numeric(Rain)) | 1.2997715 | 0.0468370 | *An.funestus* s.l. | 1.0036745 | 1.6832211 |
| scale(as.numeric(Humidity)) | 2.5934785 | 0.0004953 | *An.funestus* s.l. | 1.8989549 | 3.5420171 |
| scale(as.numeric(Wind)) | 0.8274142 | 0.1787978 | *An.funestus* s.l. | 0.6277395 | 1.0906026 |
| Locationoutdoor | 1.0668151 | 0.2995082 | *An.funestus* s.l. | 0.9441147 | 1.2054620 |
| (Intercept) | 66.3369222 | 0.0000000 | *An.gambiae* s.l. | 51.3441478 | 85.7076696 |
| scale(as.numeric(Temp)) | 0.7838779 | 0.2451473 | *An.gambiae* s.l. | 0.5198869 | 1.1819197 |
| scale(as.numeric(Rain)) | 0.8594780 | 0.3664637 | *An.gambiae* s.l. | 0.6187420 | 1.1938778 |
| scale(as.numeric(Humidity)) | 3.1597298 | 0.0008105 | *An.gambiae* s.l. | 2.1492322 | 4.6453298 |
| scale(as.numeric(Wind)) | 0.5824614 | 0.0023265 | *An.gambiae* s.l. | 0.4113194 | 0.8248122 |
| Locationoutdoor | 0.9216790 | 0.4185564 | *An.gambiae* s.l. | 0.7564135 | 1.1230526 |
| (Intercept) | 2.3831481 | 0.1701052 | *An.ziemanni* | 0.6891615 | 8.2410218 |
| scale(as.numeric(Temp)) | 0.0130476 | 0.0030513 | *An.ziemanni* | 0.0007393 | 0.2302868 |
| scale(as.numeric(Rain)) | 0.3026961 | 0.0577610 | *An.ziemanni* | 0.0880909 | 1.0401184 |
| scale(as.numeric(Humidity)) | 1.2129152 | 0.7821017 | *An.ziemanni* | 0.3088694 | 4.7630595 |
| scale(as.numeric(Wind)) | 0.0820281 | 0.0144118 | *An.ziemanni* | 0.0110668 | 0.6079971 |
| Locationoutdoor | 1.5098430 | 0.0000088 | *An.ziemanni* | 1.2590550 | 1.8105848 |

**Table S8**: Poisson binomial GLM showing associations between resistance markers and specific infection (*Plasmodium* spp.).

| Term | IRR | P_value | Species | *Plasmodium* | LCI_95 | UCI_95 |
| --- | --- | --- | --- | --- | --- | --- |
| (Intercept) | 0.0278710 | 0.0000000 | *An.funestus* s.l. | *Pf* | 0.0152634 | 0.0508925 |
| scale(L119F.Gste2) | 1.6269024 | 0.1414694 | *An.funestus* s.l. | *Pf* | 0.8503872 | 3.1124780 |
| (Intercept) | 0.0056690 | 0.0000000 | *An.funestus* s.l. | *Pm* | 0.0018965 | 0.0169458 |
| scale(L119F.Gste2) | 1.8195371 | 0.3439622 | *An.funestus* s.l. | *Pm* | 0.5267088 | 6.2856654 |
| (Intercept) | 0.0026362 | 0.0000000 | *An.funestus* s.l. | *Po* | 0.0003326 | 0.0208913 |
| scale(L119F.Gste2) | 1.1545224 | 0.0329162 | *An.funestus* s.l. | *Po* | 1.01015553 | 1.3184439 |
| (Intercept) | 0.0255691 | 0.0000000 | *An.gambiae* s.l. | *Pf* | 0.0168322 | 0.0388410 |
| scale(CYP6P3) | 1.3793478 | 0.3383139 | *An.gambiae* s.l. | *Pf* | 0.7141144 | 2.6642793 |
| scale(G119S.Ace1) | 0.9942650 | 0.9802539 | *An.gambiae* s.l. | *Pf* | 0.6305208 | 1.5678513 |
| scale(L1014F) | 1.0019496 | 0.9956919 | *An.gambiae* s.l. | *Pf* | 0.4940808 | 2.0318599 |
| scale(N1575Y) | 0.8285983 | 0.6008641 | *An.gambiae* s.l. | *Pf* | 0.4096639 | 1.6759477 |
| (Intercept) | 0.0100223 | 0.0000000 | *An.gambiae* s.l. | *Pm* | 0.0049322 | 0.0203654 |
| scale(CYP6P3) | 0.5446662 | 0.2871372 | *An.gambiae* s.l. | *Pm* | 0.1779332 | 1.6672623 |
| scale(G119S.Ace1) | 1.1325883 | 0.7478528 | *An.gambiae* s.l. | *Pm* | 0.5301553 | 2.4195859 |
| scale(L1014F) | 2.8083089 | 0.0421506 | *An.gambiae* s.l. | *Pm* | 1.0372994 | 7.6030114 |
| scale(N1575Y) | 2.2052842 | 0.1418203 | *An.gambiae* s.l. | *Pm* | 0.7677554 | 6.3344108 |
| (Intercept) | 0.0053118 | 0.0000000 | *An.gambiae* s.l. | *Po* | 0.0018810 | 0.0149996 |
| scale(CYP6P3) | 1.7925199 | 0.3308177 | *An.gambiae* s.l. | *Po* | 0.5528651 | 5.8117751 |
| scale(G119S.Ace1) | 1.1501514 | 0.7970330 | *An.gambiae* s.l. | *Po* | 0.3960574 | 3.3400418 |
| scale(L1014F) | 1.4973818 | 0.5933249 | *An.gambiae* s.l. | *Po* | 0.3402755 | 6.5892270 |
| scale(N1575Y) | 1.7880593 | 0.3975532 | *An.gambiae s.l.* | *Po* | 0.4652405 | 6.8720508 |
| (Intercept) | 0.0093061 | 0.0000000 | *An.ziemanni* | *Pf* | 0.0029865 | 0.0289983 |
| scale(L1014F) | 0.6987142 | 0.7558440 | *An.ziemanni* | *Pf* | 0.0729246 | 6.6946047 |
| (Intercept) | 0.0011488 | NaN | *An.ziemanni* | *Pm* | NaN | NaN |
| scale(L1014F) | 0.0961698 | NaN | *An.ziemanni* | *Pm* | NaN | NaN |
| (Intercept) | 1.3913780 | NaN | *An.ziemanni* | *Po* | NaN | NaN |
| scale(L1014F) | 2.4796394 | NaN | *An.ziemanni* | *Po* | NaN | NaN |

NaN = Not a Number; *Pf*= *Plasmodium falciparum*; *Pm*= *Plasmodium malariae*; *Po*= *Plasmodium ovale*

**Supplemental Figures**

**Figure S1**: *Anopheles* species composition. The inner ring represents the proportional distribution of the total number of mosquitoes collected. The outer ring displays the species-specific breakdown determined by molecular identification from a representative subsample within the *An. gambiae* complex and *An. funestus* group.


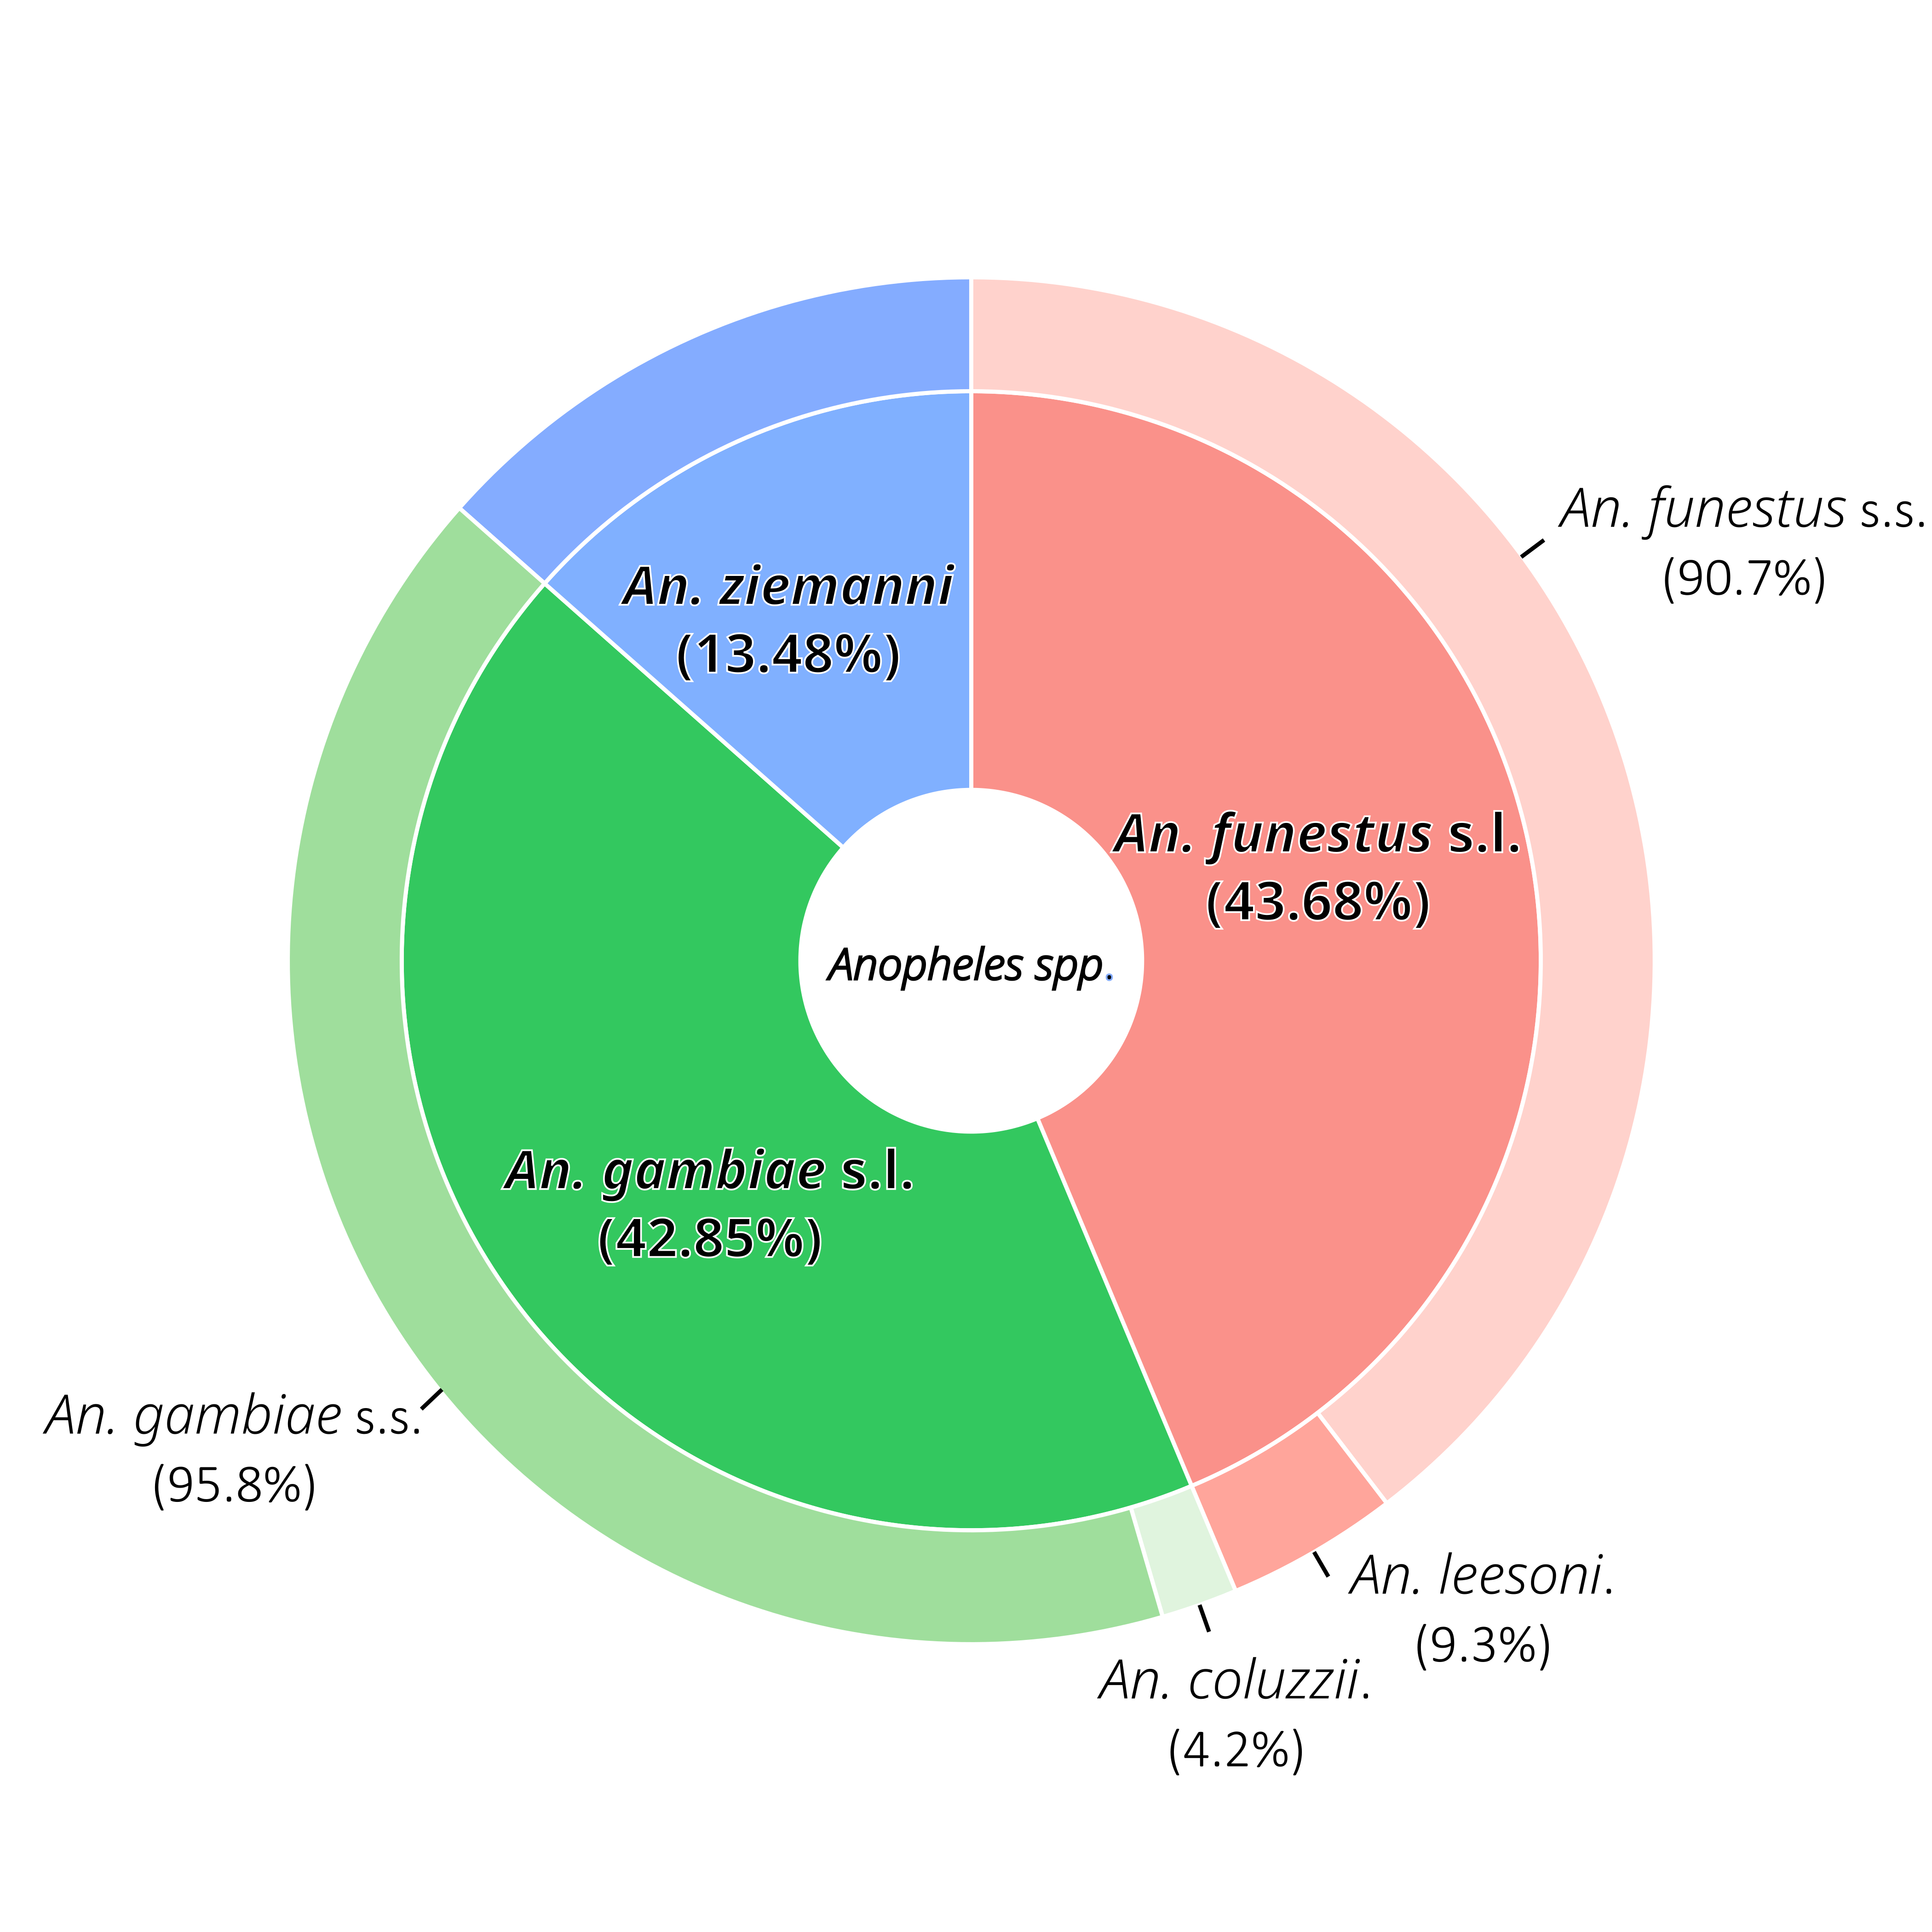


**Figure S2**: Hourly variations of the human biting rates of *Anopheles* mosquitoes.

**
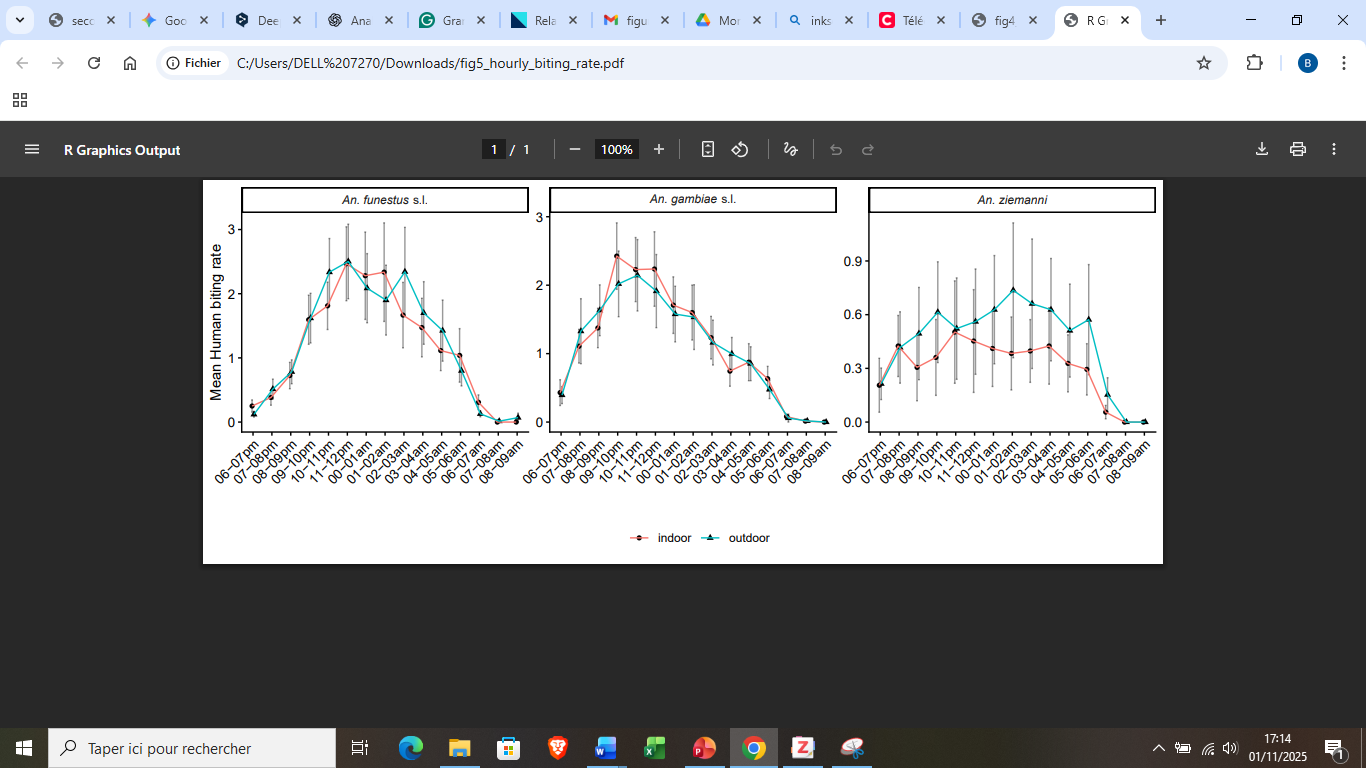
**

**Figure S3**: Seasonal variation in the parity of anopheline species during the study period.


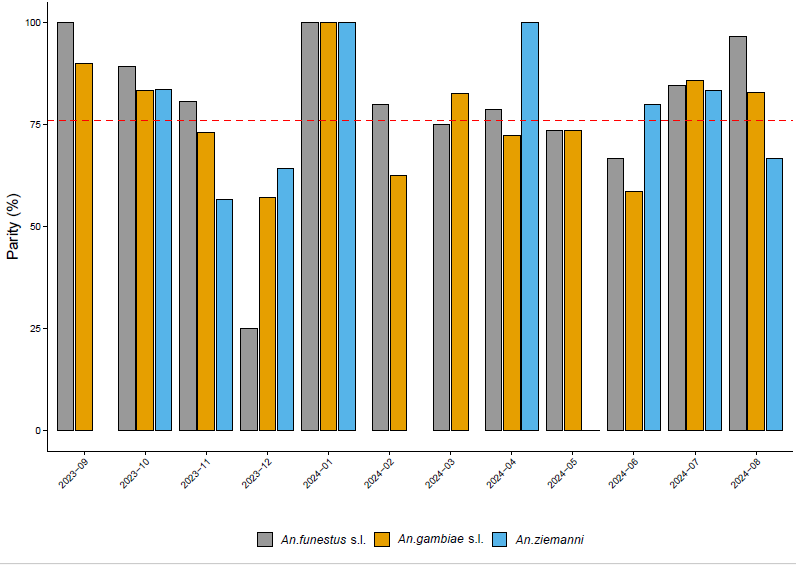


**Figure S4**: Monthly variation of infection rate (IR) and human biting rates of anopheline species during the study period.


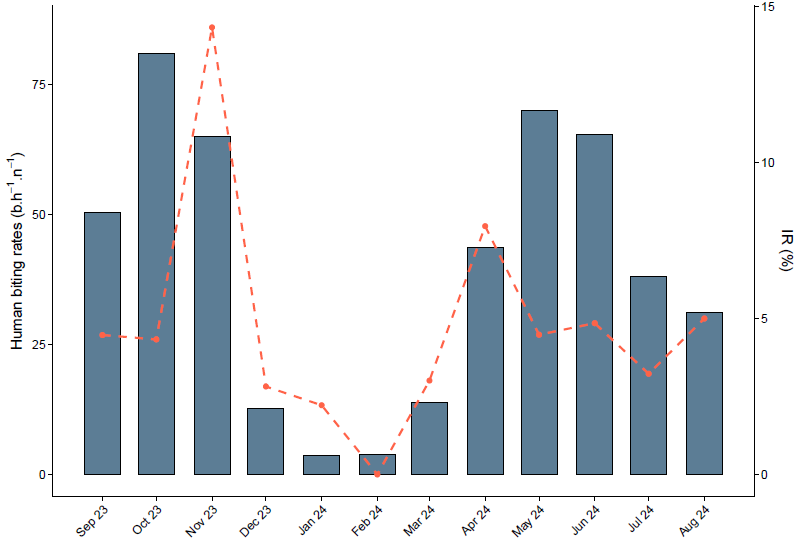


**Figure S5**: Monthly genotype variation of insecticide resistance in *Anopheles* species. Stacked area plots illustrate genotypic seasonal fluctuations in vector resistance to insecticide (resistant homozygous (RR) in orange, sensitive homozygous (SS) in blue, and heterozygous (RS) in green).


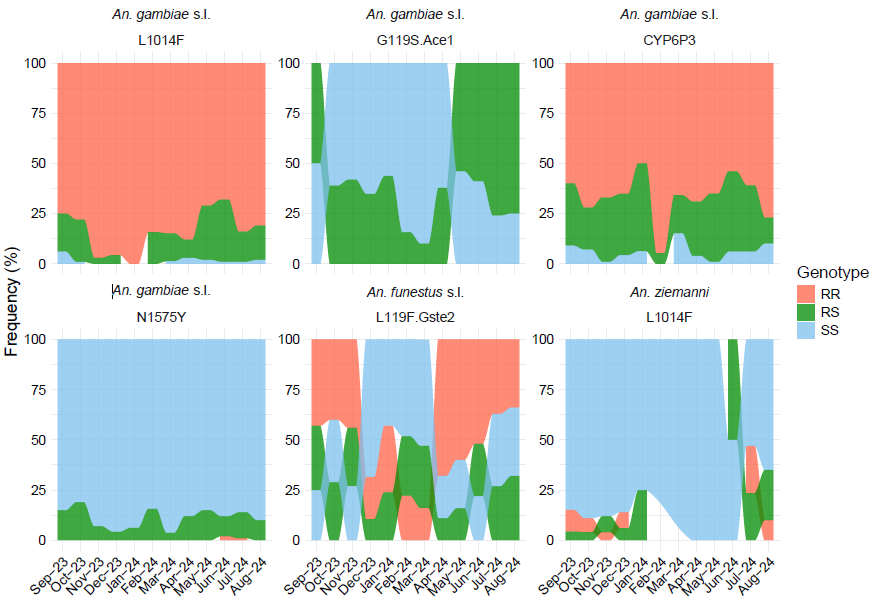


**Figure S6**: Allelic resistance frequency variation between seasons in anophelinespecies. The bar plots illustrate the frequency (%) of susceptible (S, blue) versus resistant (R, red) alleles during the dry and rainy seasons.


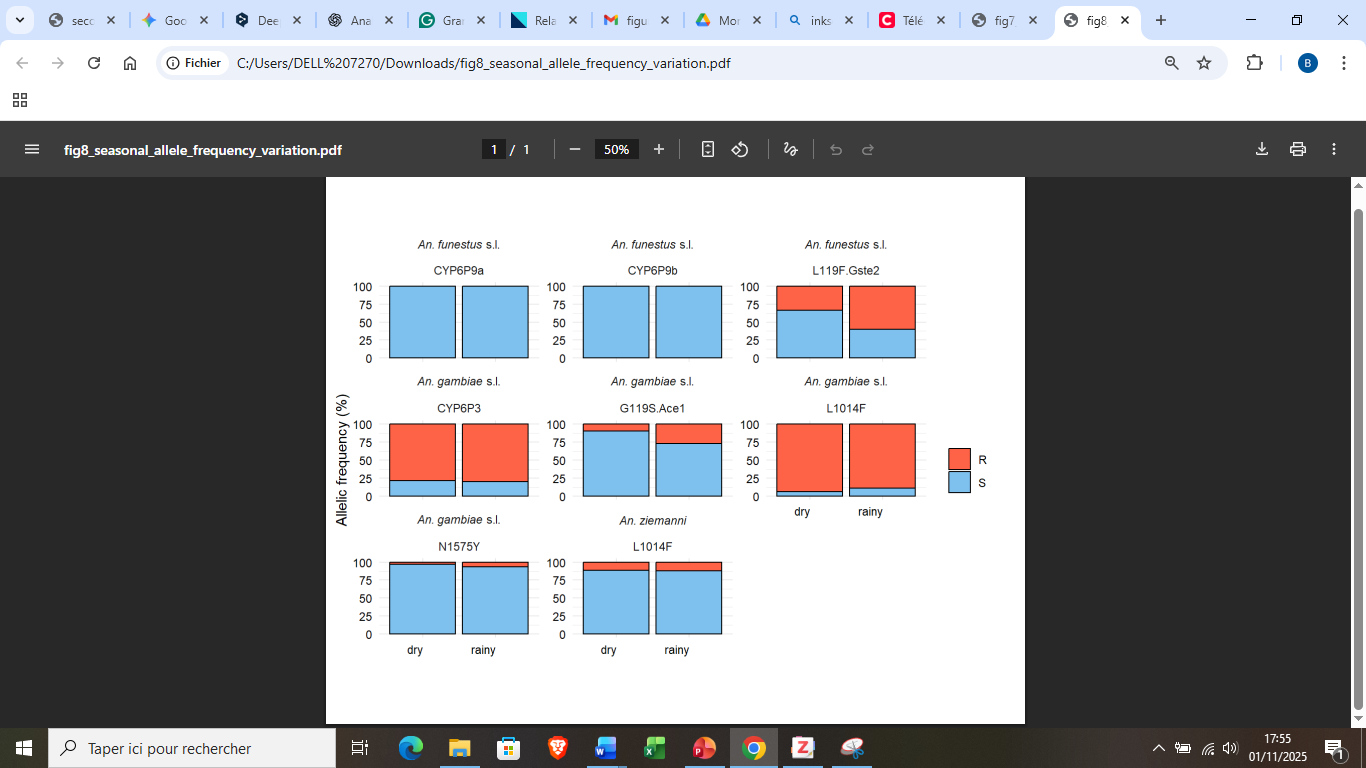

Supplement: Supplementary file 1 [file ed8adaf535b9db4f26a2cf78.docx]
